# Supplementary material for: Effect of local and remote sources and new particle formation events on the activation properties of cloud condensation nuclei in the Brazilian megacity of São Paulo
Source: Copernicus journal article supplement (doi:10.5194/acp-2016-241), 2016-04-21
Supplement: Supplementary file 1 [file acp-2016-241-supplement.pdf]

## Supplementary Information (SI)

5 **Table S1.** Comparison between  $D_{act,a}$  calculated in this study and those reported in previous studies. These activation diameters were calculated using the same principle.

| Reference                    | Site           | Environment | 0.20%  | 0.40%                | 0.60%                 | 0.80%                             | 1.0%  |
|------------------------------|----------------|-------------|--------|----------------------|-----------------------|-----------------------------------|-------|
| <b>This study</b>            |                |             |        |                      |                       |                                   |       |
| <b>Total mean</b>            |                |             | 136±43 | 108±36               | 91±35                 | 81±34                             | 74±34 |
| <b>Diurnal</b>               | Sao Paulo      | Urban       | 155±46 | 127±32               | 110±29                | 99±29                             | 92±29 |
| <b>Nocturnal</b>             |                |             | 115±25 | 87±28                | 71±28                 | 61±28                             | 54±28 |
| <b>Leng et al.(2013)</b>     | Shangai        | Urban/Coast | -      | -                    | -                     | 41 <sup>a</sup> - 68 <sup>b</sup> | -     |
| <b>Burkart et al.(2011)</b>  | Vienna         | Urban       | -      | -                    | 69 - 368 <sup>c</sup> | -                                 | -     |
| <b>Sihto et al.(2011)</b>    | Finland        | Forest      | -      | 58 - 99              | -                     | -                                 | -     |
|                              |                | Coast       | -      | 70 - 90 <sup>d</sup> | -                     | -                                 | -     |
| <b>Quinn et al.(2008)</b>    | Gulf of Mexico | Urban       | -      | > 90 <sup>e</sup>    | -                     | -                                 | -     |
|                              | Atlantic Ocean | Over Ocean  | -      | < 80                 | -                     | -                                 | -     |
|                              | California     | Urban/Coast | -      |                      | 70 - 110 <sup>d</sup> |                                   |       |
| <b>Furutani et al.(2008)</b> |                |             | -      |                      | ~110 <sup>f</sup>     |                                   |       |
|                              | Pacific Ocean  | Over Ocean  | -      |                      | 50 - 60               |                                   |       |

a - Marine air

b - Continental air

c - min-max at SS = 0.5%

d - Anthropogenic emissions or polluted air masses

e - Urban and industrial sources

f - Fresh Ship Exhaust

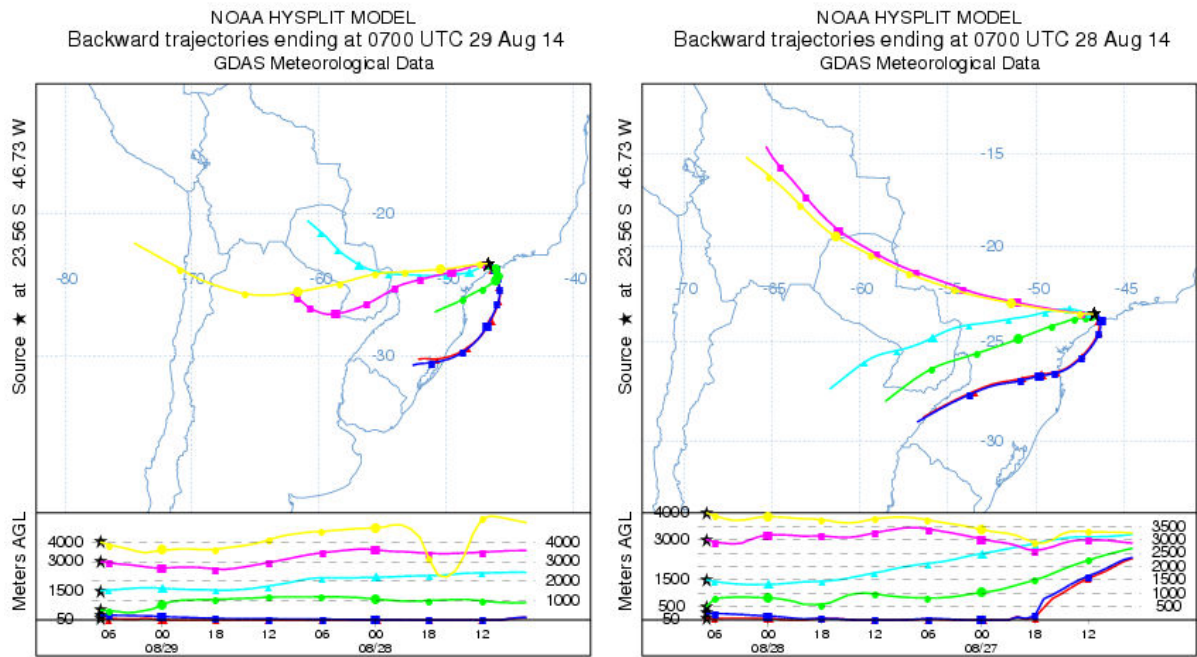

5

**Figure S1.** Hysplit backward trajectories models for days 7 and 8. For these period was observed Cl and Pb higher concentrations which were associated with air masses from ocean, as discusses in Section 3.3.

10
